# Supplementary material for: p38-MK2 signaling axis regulates RNA metabolism after UV-light-induced DNA damage
Source: PubMed Central journal article supplement (PMC5845016; doi:10.1038/s41467-018-03417-3), 2018-03-09
Supplement: 41467_2018_3417_MOESM3_ESM.pdf [file 41467_2018_3417_MOESM3_ESM.pdf]

## Description of Additional Supplementary Files

File Name: Supplementary Data 1

Description: The excel workbook contains a spreadsheet with all quantified phosphorylated peptides from U2OS cells treated as described in Figure 1c.

File Name: Supplementary Data 2

Description: The excel workbook contains a spreadsheet with all quantified phosphorylated peptides from U2OS cells treated as described in Figure 2a.

File Name: Supplementary Data 3

Description: The excel workbook contains a spreadsheet with all quantified phosphorylated peptides from U2OS after knockdown of MK2/3 or MK5 (SILAC light: UV light, control siRNA; SILAC medium: UV light, MK2/3 knockdown; SILAC heavy: UV light, MK5 knockdown)

File Name: Supplementary Data 4

Description: The excel workbook contains a spreadsheet with all quantified protein groups in 14-3-3 pull downs from U2OS cells treated as described in Supplementary Figure 2b.

File Name: Supplementary Data 5

Description: The excel workbook contains a spreadsheet with all quantified chromatin-associated proteins from U2OS cells treated as described in Supplementary Figure 6a.

File Name: Supplementary Data 6

Description: The excel workbook contains a spreadsheet with calculated PRRs in mock-treated and UV light-exposed cells (40 J/m<sup>2</sup>, 1 hour recovery) from RNA pol II ChIP-seq data obtained in U2OS cells.
